# Supplementary material for: Switching Xe/Kr adsorption selectivity in modified SBMOF-1: a theoretical study
Source: PubMed Central journal article supplement — RSC Adv. 2020 May 1;10(29):17195–204. doi: 10.1039/d0ra02212h (PMC9053438; doi:10.1039/d0ra02212h), 2020-05-01
Supplement: RA-010-D0RA02212H-s001.pdf [file RA-010-D0RA02212H-s001.pdf]

Electronic Supplementary Material (ESI) for RSC Advances.

This journal is © the Owner Societies 2020

## Switching Xe/Kr adsorption Selectivity in the Modified SBMOF-1: A Theoretical Study

Jiao-jiao Qian,<sup>a</sup> Guang-hui Chen,<sup>\*a</sup> Song-tao Xiao,<sup>b</sup> Hui-bo Li,<sup>b</sup> Ying-gen Ouyang,<sup>b</sup> Qiang Wang<sup>c</sup>

---

<sup>a</sup>Department of Chemistry and Key Laboratory for Preparation and Application of Ordered Structural Materials of Guangdong Province, Shantou University, Guangdong 515063, China. E-mail: [ghchen@stu.edu.cn](mailto:ghchen@stu.edu.cn)

<sup>b</sup>Institute of Radiochemistry, China Institute of Atomic Energy (CIAE), Beijing, 102413, People's Republic of China.

<sup>c</sup>Department of Applied Chemistry, College of Science, Nanjing Tech University, Nanjing 211816, People's Republic of China.

**Table S1.** Crystal coordinate data of Mg-SBMOF-1.

| compound               |              | Mg-SBMOF-1  |             |
|------------------------|--------------|-------------|-------------|
| crystal system         |              | Monoclinic  |             |
| space group            |              | P21/N       |             |
| a (Å)                  |              | 11.8819     |             |
| b (Å)                  |              | 5.5555      |             |
| c (Å)                  |              | 22.6411     |             |
| A (deg)                |              | 90.0000     |             |
| β (deg)                |              | 101.3020    |             |
| γ (deg)                |              | 90.0000     |             |
| coordinate information |              |             |             |
| Mg                     | 1.302877215  | 4.249901945 | 1.297709219 |
| S                      | 4.463027919  | 3.083191390 | 2.415803937 |
| O                      | 11.151640648 | 4.029404150 | 1.285942138 |
| O                      | 2.318243970  | 5.449334395 | 8.514926255 |
| O                      | 4.484505091  | 1.436818965 | 2.452215282 |
| O                      | 10.277164372 | 5.988829000 | 0.450479385 |
| O                      | 3.507131407  | 3.949904945 | 1.349217951 |
| O                      | 2.660195853  | 3.191690305 | 8.806883076 |
| C                      | 3.372922813  | 4.156125105 | 6.782279079 |
| C                      | 4.103405741  | 3.604741730 | 4.196185498 |
| C                      | 6.235770211  | 3.618019375 | 2.050358364 |
| C                      | 8.793321228  | 4.415566955 | 1.446462885 |
| C                      | 4.108354576  | 2.992747850 | 6.498981053 |
| H                      | 4.308918551  | 2.278643880 | 7.298032460 |
| C                      | 10.172437840 | 4.841784915 | 1.035725151 |
| C                      | 8.583839765  | 3.190801425 | 2.101645075 |
| H                      | 9.442911116  | 2.550696715 | 2.309678187 |
| C                      | 3.073110335  | 5.080171420 | 5.763427478 |
| H                      | 2.491449065  | 5.971106955 | 5.997881017 |
| C                      | 2.764021590  | 4.294845940 | 8.156585334 |
| C                      | 7.280351149  | 2.766139005 | 2.422908589 |
| H                      | 7.103917556  | 1.822092890 | 2.937107828 |
| C                      | 4.489737663  | 2.695250825 | 5.184620304 |
| H                      | 5.036762454  | 1.783148835 | 4.949278684 |
| C                      | 6.401736333  | 4.845673765 | 1.433363681 |
| H                      | 5.550547472  | 5.497945020 | 1.238207752 |
| C                      | 3.438501165  | 4.797396470 | 4.435745506 |
| H                      | 3.221800480  | 5.500056110 | 3.628257323 |
| C                      | 7.703705937  | 5.243058680 | 1.107215718 |
| H                      | 7.877060062  | 6.155160670 | 0.533515013 |

**Table S2.** modified force field parameters for MOF atoms.

| atom | $\epsilon$ /k(KJ/mol) | $\sigma$ (Å) | atom | $\epsilon$ /k(KJ/mol) | $\sigma$ (Å) |
|------|-----------------------|--------------|------|-----------------------|--------------|
| Ca   | 0.24                  | 3.40         | Ti   | 0.07                  | 2.83         |
| Mg   | 0.46                  | 2.69         | Zn   | 0.52                  | 2.46         |
| Cd   | 0.95                  | 2.54         | Kr   | 1.38                  | 3.64         |
| Xe   | 1.84                  | 4.10         | S    | 1.44                  | 3.59         |

**Table S3.** Adsorption Energies for Kr and Xe in X-SBMOF-1(X = Ca, Mg, Ti, Zn, Cd).

| MOF        | $Q_{st}(\text{KJ/mol})$ |                    |                     |                    | $E_{ads}(\text{KJ/mol})$ |        |
|------------|-------------------------|--------------------|---------------------|--------------------|--------------------------|--------|
|            | Kr                      |                    | Xe                  |                    | Kr                       | Xe     |
| Mg-SBMOF-1 | -24.25                  |                    | -22.61              |                    | -28.53                   | -18.56 |
|            | -21.19 <sup>a</sup>     | -0.09 <sup>b</sup> | -19.58 <sup>a</sup> | -0.05 <sup>b</sup> |                          |        |
| SBMOF-1    | -27.21                  |                    | -34.46              |                    | -30.21                   | -36.39 |
|            | -23.37 <sup>a</sup>     | -0.86 <sup>b</sup> | -29.32 <sup>a</sup> | -2.16 <sup>b</sup> |                          |        |
| Zn-SBMOF-1 | -25.86                  |                    | -30.63              |                    | -29.86                   | -33.84 |
|            | -22.42 <sup>a</sup>     | -0.47 <sup>b</sup> | -26.61 <sup>a</sup> | -1.04 <sup>b</sup> |                          |        |
| Cd-SBMOF-1 | -26.24                  |                    | -30.09              |                    | -28.24                   | -31.43 |
|            | -22.81 <sup>a</sup>     | -0.45 <sup>b</sup> | -26.23 <sup>a</sup> | -0.88 <sup>b</sup> |                          |        |
| Ti-SBMOF-1 | -13.61                  |                    | -13.04              |                    | -14.91                   | -14.47 |
|            | -12.93 <sup>a</sup>     | 0.00 <sup>b</sup>  | -12.81 <sup>a</sup> | 0.00 <sup>b</sup>  |                          |        |

$E_{ads}$  were calculated at GGA-PBE/DNP level.

a. represents the adsorption heat contributed by the host- guest interaction; b. represents the adsorption heat contributed by the host- guest interaction.

**Table S4.** Energy decomposition analysis of interaction between modified MOFs and Kr (unit: KJ/mol).

|                          | S-F-2  | S-CH <sub>3</sub> -2 | S-OH-2 | S-NH <sub>2</sub> -2 | 6NH <sub>2</sub> -MgSBMOF-1 |
|--------------------------|--------|----------------------|--------|----------------------|-----------------------------|
| $\Delta E_{\text{elec}}$ | -0.57  | -0.49                | -0.58  | -0.918               | -0.75                       |
| percentage               | 3.5%   | 2.1%                 | 3.4%   | 4.9%                 | 3.5%                        |
| $\Delta E_{\text{exc}}$  | 1.58   | 9.40                 | 1.23   | 2.072                | 1.75                        |
| $\Delta E_{\text{indu}}$ | -8.40  | -4.88                | -7.34  | -7.924               | -10.36                      |
| percentage               | 51.1%  | 20.5%                | 42.5%  | 42.1%                | 48.0%                       |
| $\Delta E_{\text{disp}}$ | -7.47  | -18.44               | -9.34  | -9.986               | -10.48                      |
| percentage               | 45.4%  | 77.4%                | 54.1%  | 53.0%                | 48.5%                       |
| $\Delta E_{\text{tot}}$  | -14.86 | -14.41               | -16.03 | -16.756              | -19.83                      |

$\Delta E_{\text{elec}}$ ,  $\Delta E_{\text{exc}}$ ,  $\Delta E_{\text{indu}}$ ,  $\Delta E_{\text{disp}}$ ,  $\Delta E_{\text{tot}}$  represent electrostatic interaction, exchange interaction, induction interaction, dispersion interaction and total interaction respectively.

### Figure Captions

**Fig. S1** Unit cell structure diagram of X-SBMOF-1(X=Ca(a), Mg(b), Ti(c), Zn(d), Cd(e)) and SBMOF-1-Y (Y = -F(f), -CH<sub>3</sub>(g), -OH(h), -NH<sub>2</sub>(i)).

**Fig. S2** Simulated (a) Xe and (b) Kr adsorption isotherm on SBMOF-1 along with the previously reported experimental data at 298 K.

**Fig. S3**(a) Energy-time curve of simulated annealing process by Forceite module;(b) Cell structure of Mg-SBMOF-1 after annealing simulation.

**Fig. S4** The optimized single-substitution modified ligand SDB structure. Gray, red, dark blue, baby blue, yellow and white balls denote C, O, N, F, S, H atoms respectively.

**Fig. S5** Calculated ground cavity diameter (GCD), pore limiting diameter (PLD) and largest cavity diameter (LCD) of single substitution modified Mg-SBMOF-1.

**Fig. S6** Electrostatic potential map of single substitution modified Mg-SBMOF-1, (a) Mg-SBMOF-1; (b) 2-F-Mg-SBMOF-1; (c) 2-CH<sub>3</sub>-Mg-SBMOF-1; (d) 2-OH-Mg-SBMOF-1; (e) 2-NH<sub>2</sub>-Mg-SBMOF-1.

**Fig. S7** Structure of organic ligand modified by amino poly-substitution.

**Fig. S8** Simulated unary (a) Xe, (b) Kr adsorption isotherms on Mg-SBMOF-1 modified by -NH<sub>2</sub> with various number at different position with GCMC; (c) Calculated ground cavity diameter (GCD), pore limiting diameter (PLD) and largest cavity diameter (LCD) of double or multiple -NH<sub>2</sub> modified Mg-SBMOF-1; (d) Calculated unary Kr adsorption isotherms and polarizability on Mg-SBMOF-1 modified by -NH<sub>2</sub> with various number at different position with GCMC.

**Fig. S9** The calculated Xe and Kr adsorption sites in SBMOF-1 at B3LYP/6-31+G(d)/SDD level.

**Fig. S10** Intermolecular interactions (iso-surfaces: 0.005 a.u.) for different models using IGM analysis. (a) SBMOF-1 based host Xe; (b) SBMOF-1 based host Kr. All iso-surfaces are colored according to a BGR (blue-green-red, blue represents a strong attraction, green represents Vdw interaction, red denotes a strong repulsion) scheme over the electron density range  $-0.05 < \rho(r) < 0.05$  a.u.

**Fig. S11** (a) Simulated adsorption selectivity of Mg-SBMOF-1 for Kr/Xe at different molar fractions with GCMC; simulated the different molar ratios binary mixtures (Kr/Xe) isotherms with various temperature (b) 243 K; (c) 263K; (d) 298 K; (e) 313 K.

Fig. S1

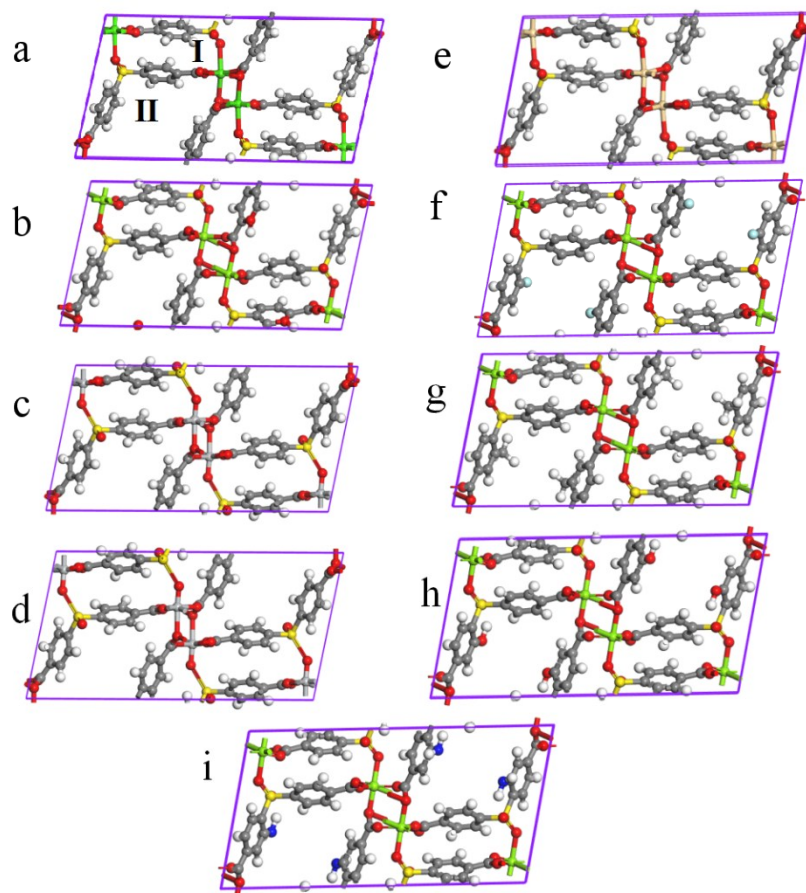

Fig. S2

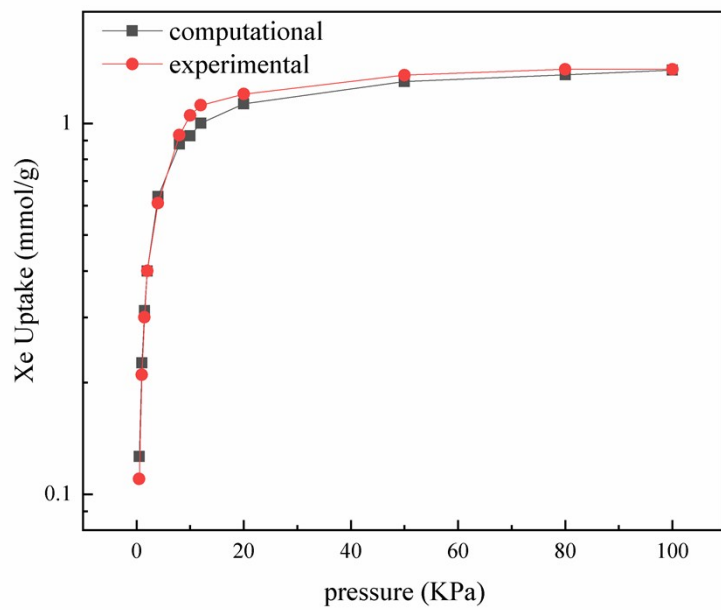

(a)

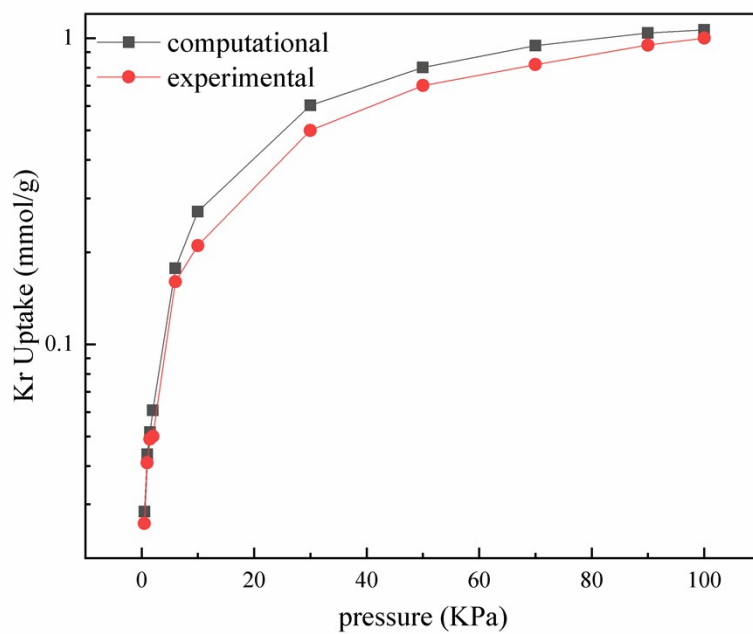

(b)



Fig. S3

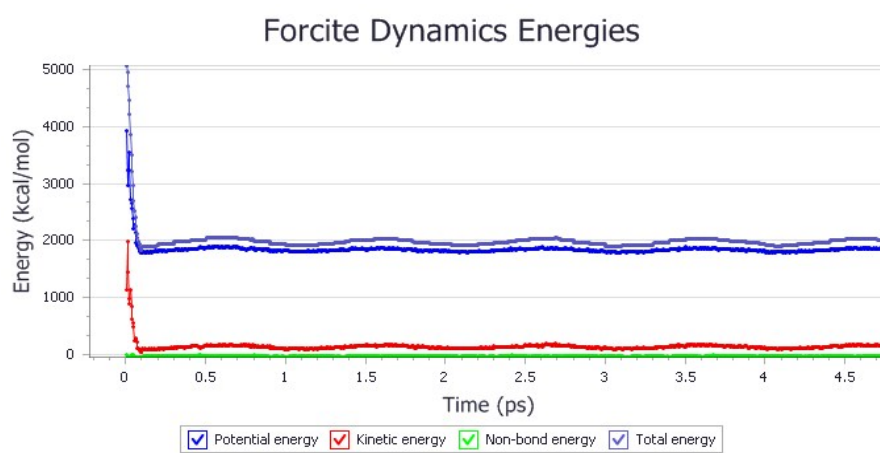

(a)

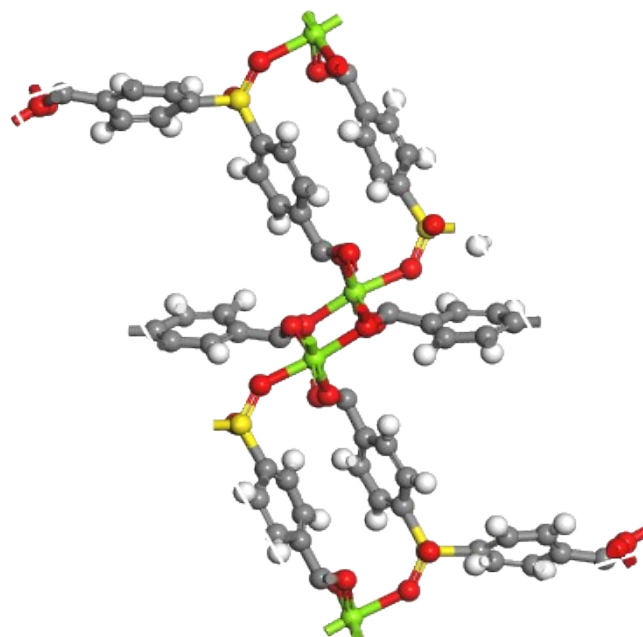

(b)

Fig. S4

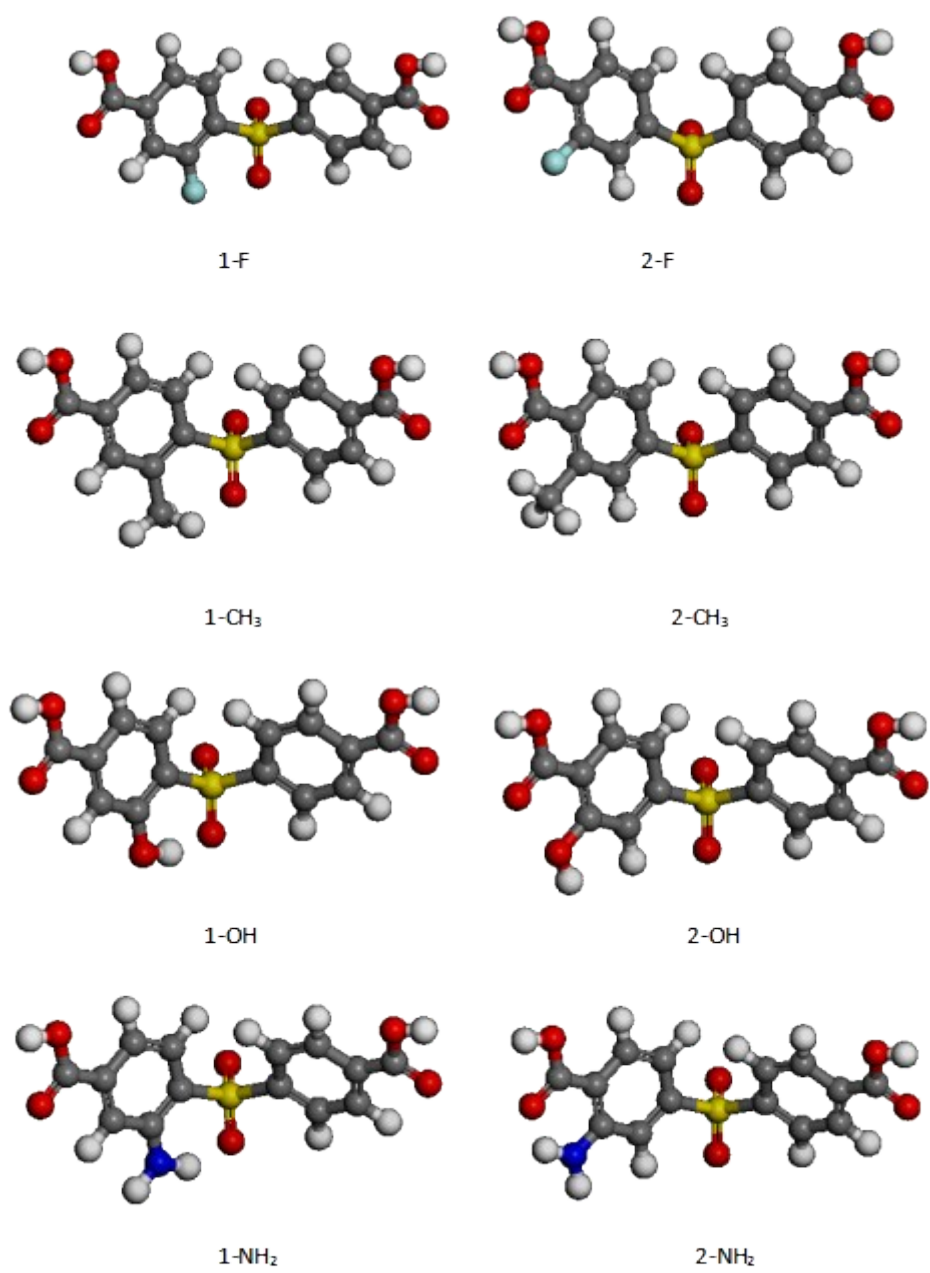

Fig. S5

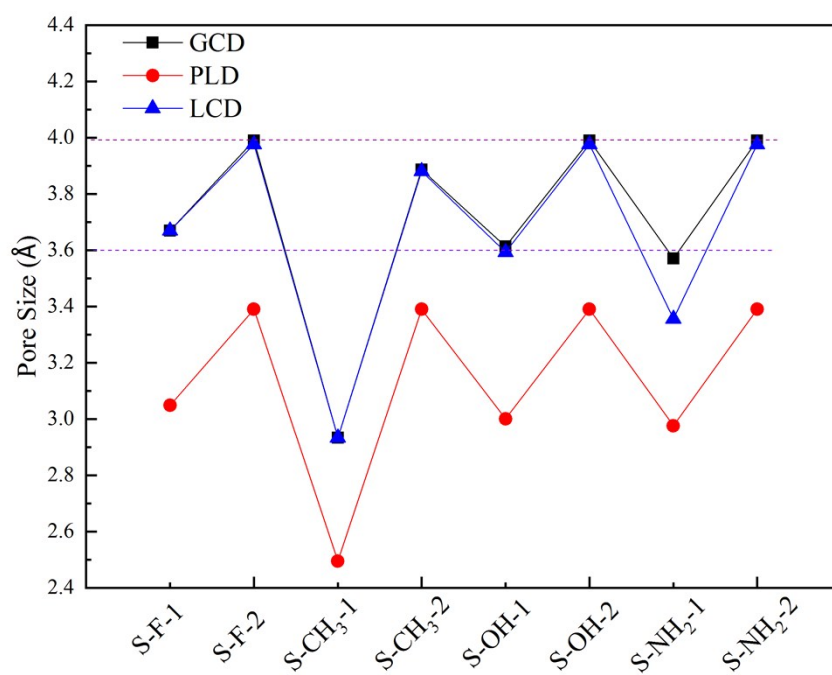

Fig. S6

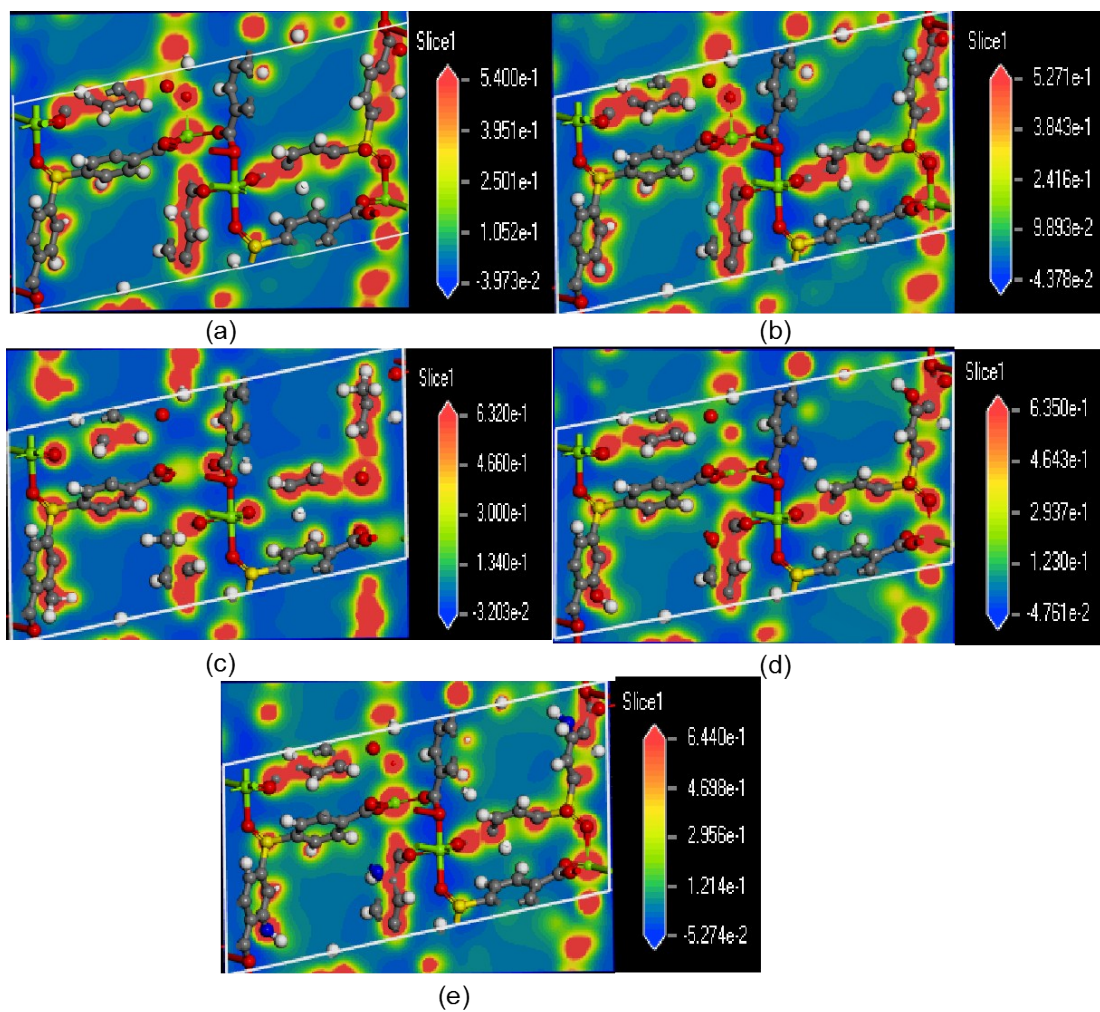

Fig. S7

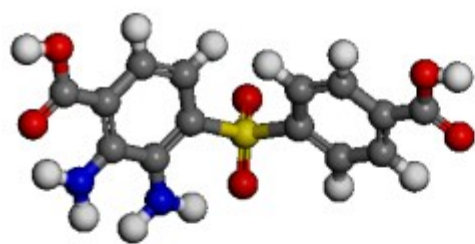

D-NH<sub>2</sub>-1

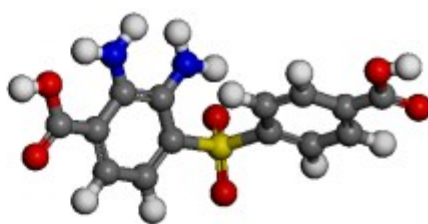

D-NH<sub>2</sub>-2

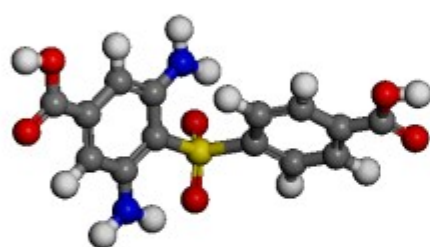

D-NH<sub>2</sub>-3

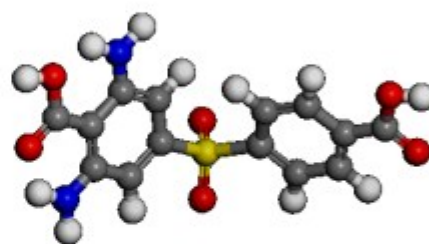

D-NH<sub>2</sub>-4

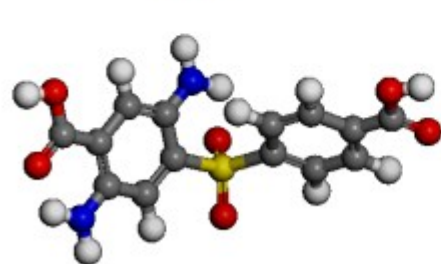

D-NH<sub>2</sub>-5

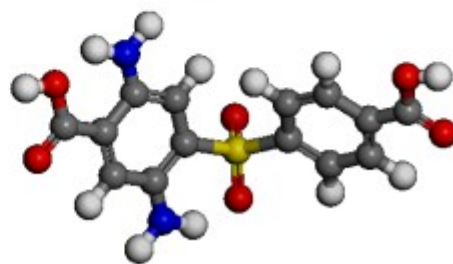

D-NH<sub>2</sub>-6

Fig. S8

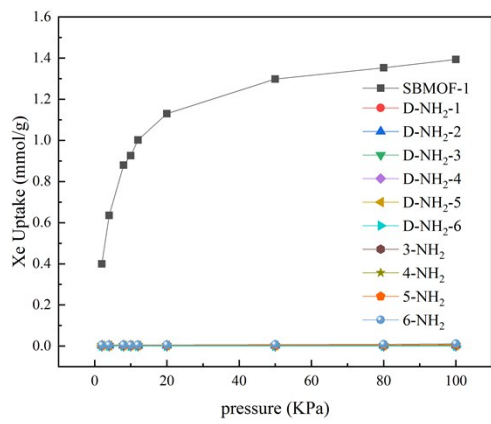

(a)

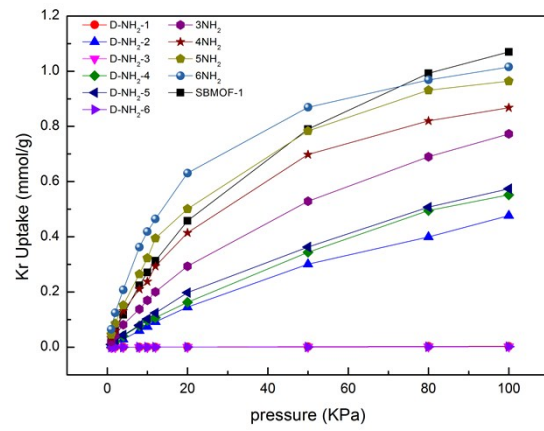

(b)

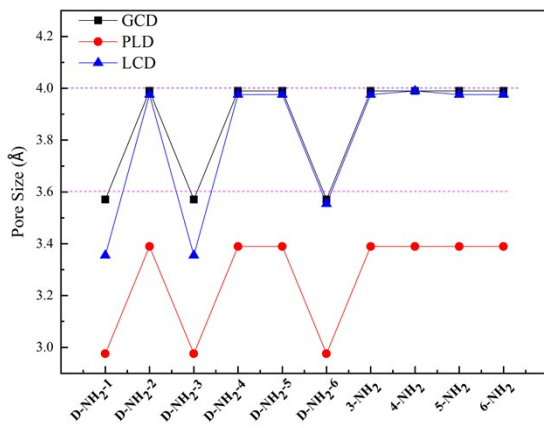

(c)

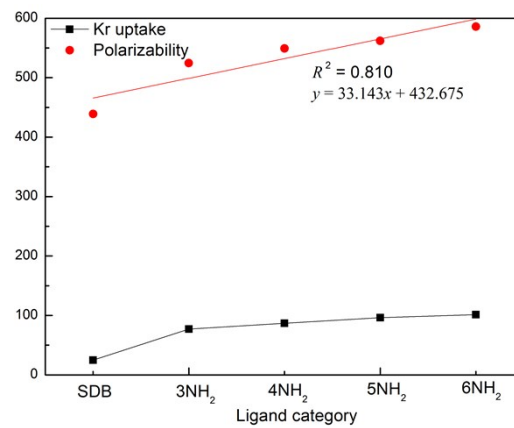

(d)

Fig. S9

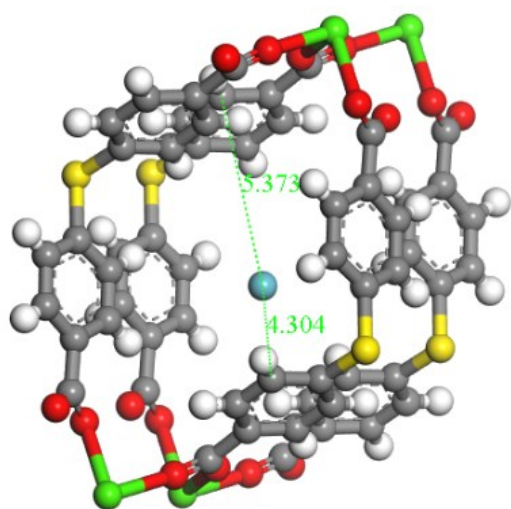

(a)

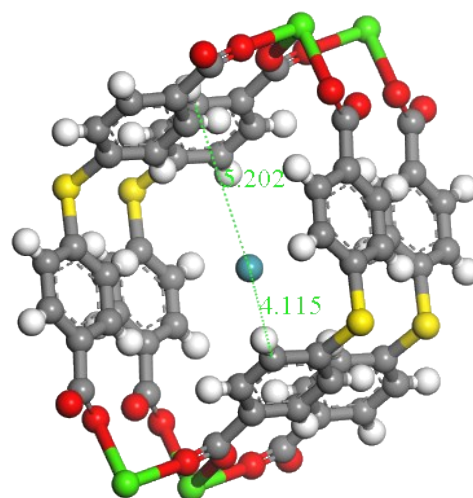

(b)



Fig. S10

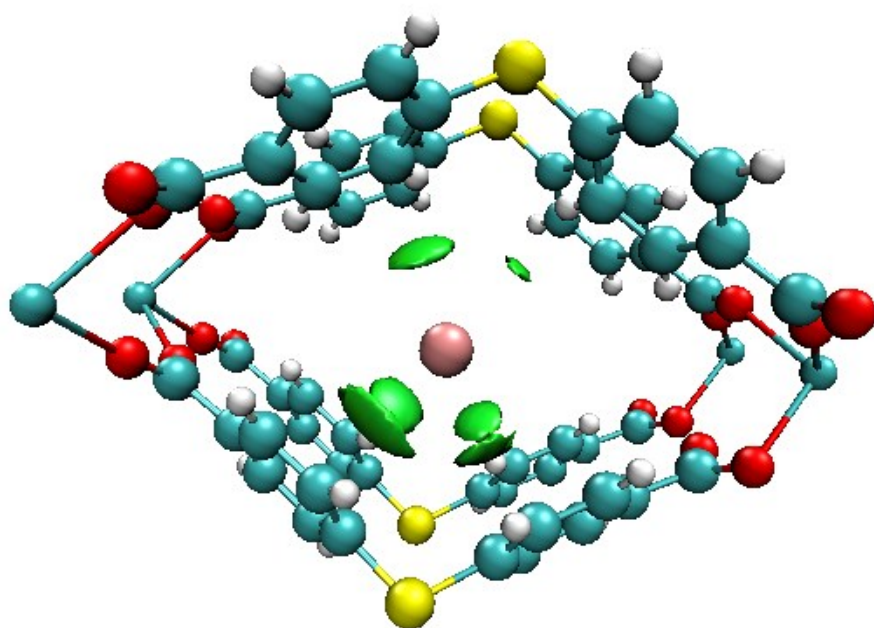

(a)

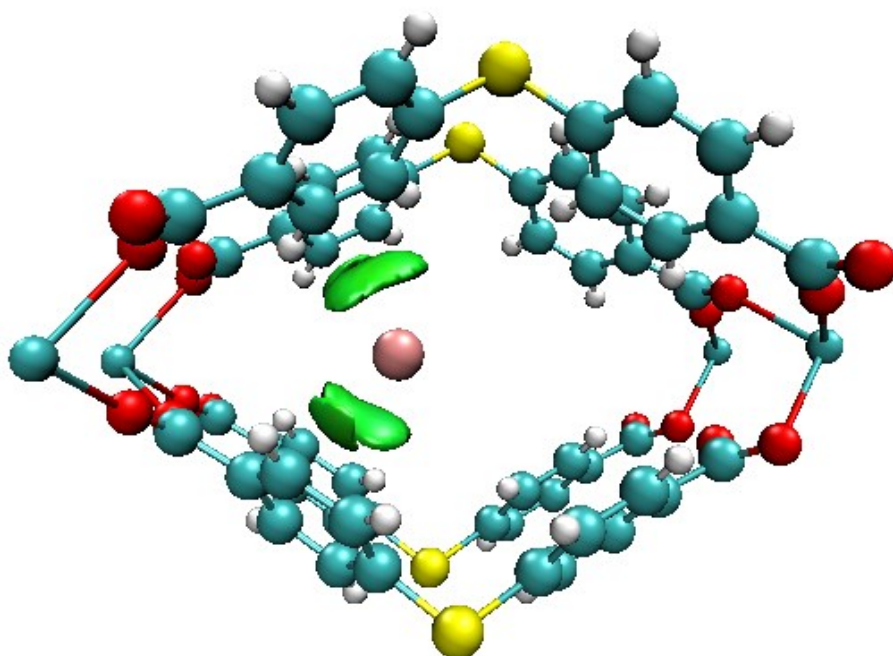

(b)



Fig. S11

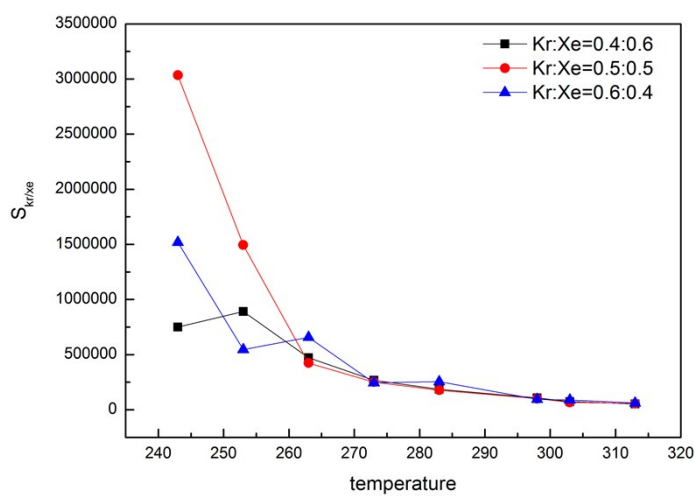

(a)

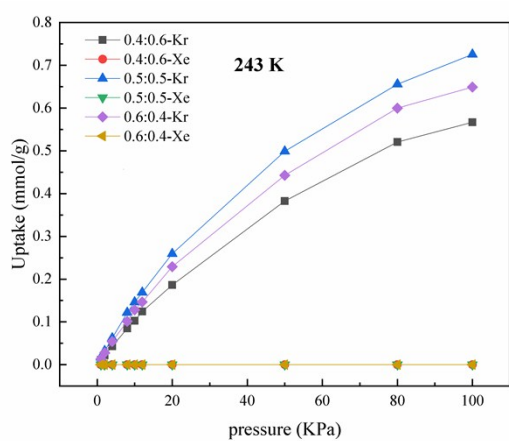

(b)

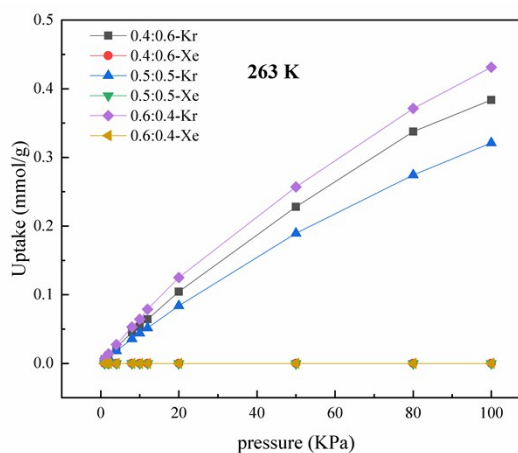

(c)

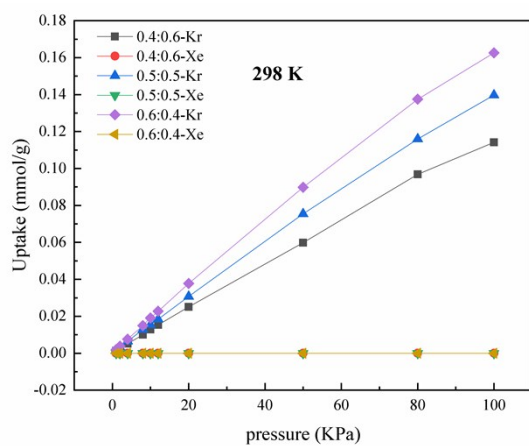

(d)

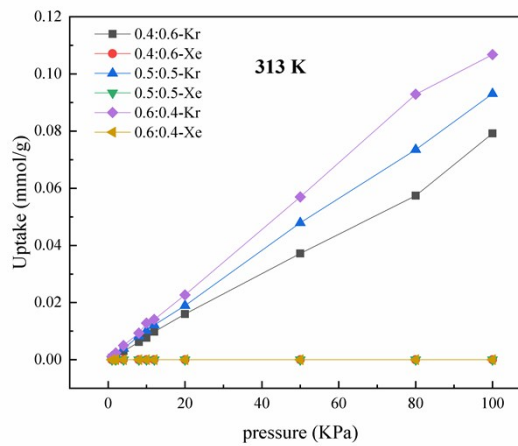

(e)
